# Supplementary material for: PEGylated chitosan grafted with polyamidoamine-dendron as tumor-targeted magnetic resonance imaging contrast agent
Source: Royal Society of Chemistry journal article supplement (doi:10.1039/c7nj00860k), 2017-01-01
Supplement: c7nj00860k1.pdf [file c7nj00860k1.pdf]

Electronic Supplementary Information (ESI) for New Journal of Chemistry

**PEGylated Chitosan Grafted with Polyamidoamine-dendron as Tumor-targeted  
Magnetic Resonance Imaging Contrast Agent**

Guangyue Zu,<sup>‡a,d</sup> Xiaoyan Tong,<sup>‡a</sup> Tingting Zhang,<sup>c</sup> Yi Cao,<sup>a</sup> Ye Kuang,<sup>a</sup> Kunchi  
Zhang,<sup>\*b</sup> Yajie Zhang,<sup>a</sup> Liqiang Luo,<sup>d</sup> Min Liu,<sup>\*a</sup> Renjun Pei,<sup>\*a</sup>

<sup>a</sup>CAS Key Laboratory of Nano-Bio Interface, Suzhou Institute of Nano-Tech and Nano-Bionics,  
Chinese Academy of Sciences, Suzhou 215123, China.

E-mail: rjpei2011@sinano.ac.cn, Tel: 86-512-62872776

<sup>b</sup>Shanghai University of Medicine & Health Sciences, Shanghai 200120, China.

<sup>c</sup>School of Pharmacy, Xi'an Jiaotong University, Xi'an 710061, China.

<sup>d</sup>Department of Chemistry, College of Sciences, Shanghai University, Shanghai 200444, China.

<sup>‡</sup> Guangyue Zu and Xiaoyan Tong contributed equally to this work.

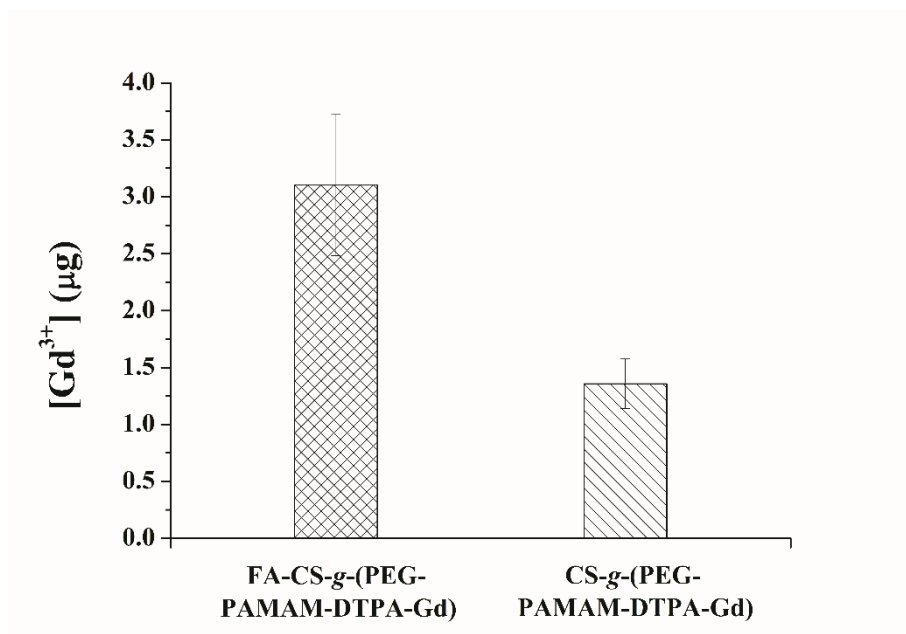

**Fig. S1:** Quantitative analysis of Gd content in KB cells treated with FA-CS-*g*-(PEG-PAMAM-DTPA-Gd) and CS-*g*-(PEG-PAMAM-DTPA-Gd)
